# Supplementary material
Source: PubMed Central journal article supplement (PMC2767204)
Supplement: NIHMS134530-supplement-01.pdf [file NIHMS134530-supplement-01.pdf]

1  
2  
3  
4  
5  
6  
7  
8  
9  
10 **Supplemental Information:**  
11

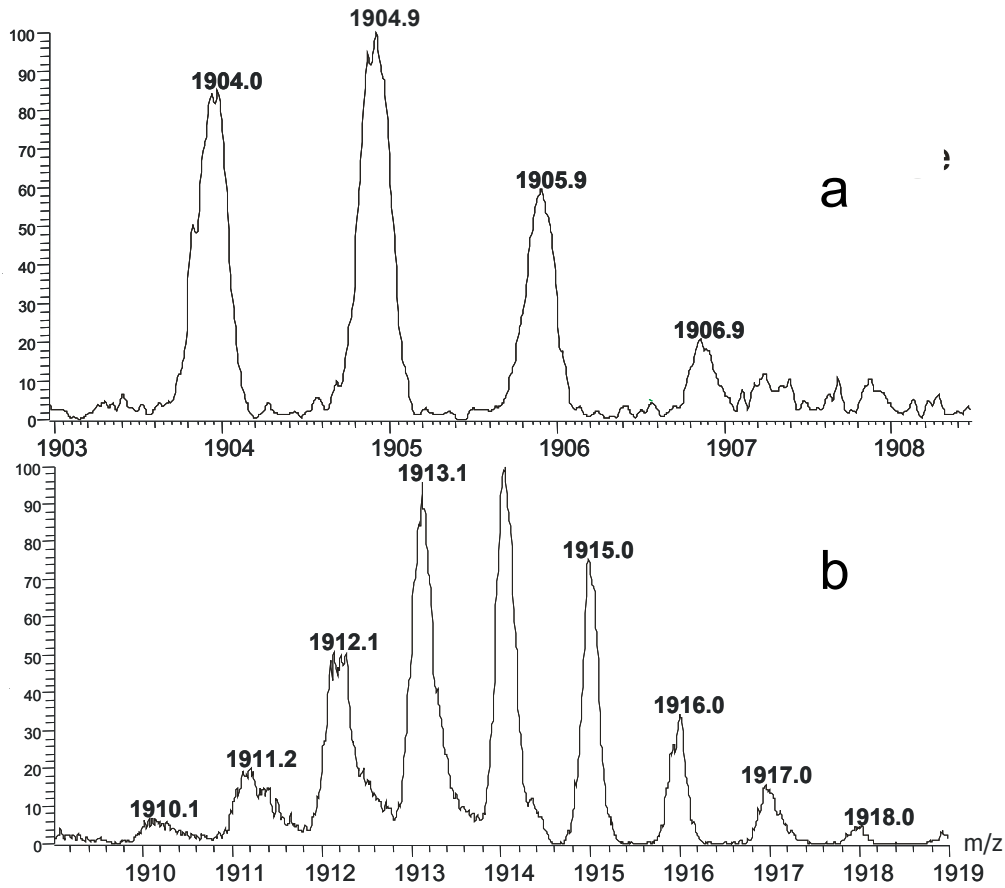

Figure 7: Mass spectral region of  $(M + Na)^+$ , a. before, and b. after 45 mins of H/D exchange in a suspension of vesicles in ammonium acetate.
